# Supplementary material for: Modeling the Effects of Integrating Larval Habitat Source Reduction and Insecticide Treated Nets for Malaria Control
Source: PLoS One. 2009 Sep 9;4(9):e6921. doi: 10.1371/journal.pone.0006921 (PMC2734167; doi:10.1371/journal.pone.0006921)
Supplement: Appendix S1 — The calculation of optimal human density (0.05 MB DOC) [file pone.0006921.s001.doc]

**Calculating the optimal human density, σ***

As stated, ‘optimal human density’ refers to the density of humans at which R0 is maximized. We therefore start with the equation for R0:

**Equation A1**

We separate the elements which are affected by human density from the elements which are not:

**Equation A2**

Hence:

**Equation A3**

Higher human density (*σ*) decreases *m* by a factor of 1/*σ*, therefore in order to maximize R0, we want to maximize the expression:

**Expression A4**

Beginning with the situation whereby , we want to maximize:

**Expression A5**

Multiplying the brackets out results in:

**Expression A6**

Maximizing Expression 6 is the same as minimizing its inverse. To do this, we have to find the derivative of the inverse of Expression 6, set it to equal zero and solve for *σ*:

**Equation A7**

**Equation A8**

**Equation A9**

Which becomes:

**Equation A10**

Finally, substituting for *ε* we can solve for the condition that

**Equation A11**

Hence, we show that:

**Equation A12**
